# Supplementary material for: Cationicity Enhancement on the Hydrophilic Face of Ctriporin Significantly Reduces Its Hemolytic Activity and Improves the Antimicrobial Activity against Antibiotic-Resistant ESKAPE Pathogens
Source: MDPI journal article supplement (doi:10.3390/toxins16030156), 2024-03-18

# **Cationicity Enhancement on the Hydrophilic Face of Ctriporin Significantly Reduces Its Hemolytic Activity and Improves the Antimicrobial Activity Against Antibiotic-Resistant ESKAPE Pathogens**

## **Contents of Supporting Information**

**Supplemental Figure S1:** Correlations between net charge and hydrophobicity as well as hydrophobic moments of Ctriporin and its analogs.

**Supplemental Figure S1:** Correlations between net charge and hydrophobicity as well as hydrophobic moments of Ctriporin and its analogs.

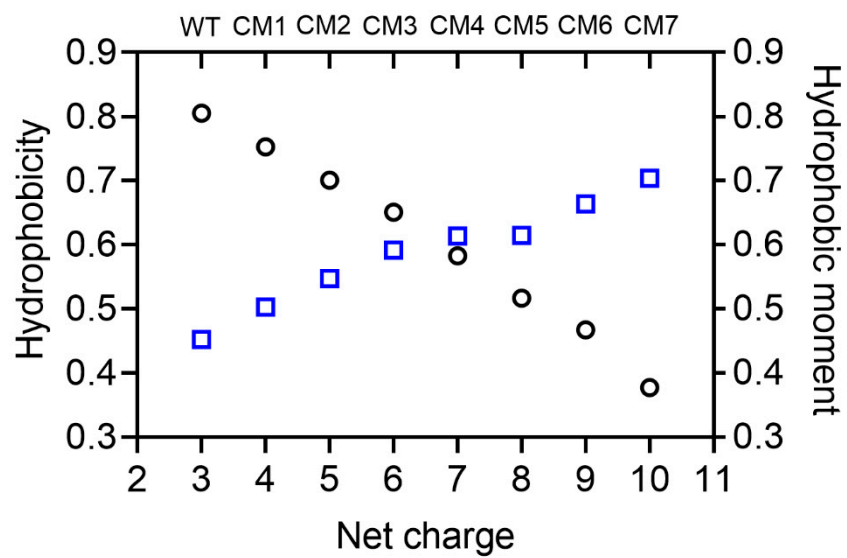

Supplement: s1 [file s1]
